# Supplementary material
Source: Frontiers journal article supplement (https://www.frontiersin.org/articles/488144)
Supplement: Table_5.XLS [file Table_5.XLS]

## Sheet: Sheet1
Supplementary Table S5. KEGG enrichment analysis of the differential expression genes in the p53 KO CNE2 and control CNE2 cells
Name	Map	Count1	Count2	Count3	Count4	p	Gene_in_DE	Up_Gene	Up_Count	Down_Gene	Down_Count	Links	Result
Cytokine-cytokine receptor interaction	map04060	36	141	816	6809	0.000149086	ENSG00000125726|K05470;ENSG00000136244|K05405;ENSG00000115590|K04387;ENSG00000145777|K05436;ENSG00000049249|K05146;ENSG00000174564|K05137;ENSG00000064300|K02583;ENSG00000134470|K05074;ENSG00000164136|K05433;ENSG00000175505|K05421;ENSG00000125538|K04519;ENSG00000142677|K05138;ENSG00000135960|K05162;ENSG00000104432|K05431;ENSG00000116678|K05062;ENSG00000198223|.|K05066;ENSG00000205755|K05078;ENSG00…	ENSG00000125726|K05470;ENSG00000136244|K05405;ENSG00000145777|K05436;ENSG00000049249|K05146;ENSG00000174564|K05137;ENSG00000064300|K02583;ENSG00000134470|K05074;ENSG00000164136|K05433;ENSG00000125538|K04519;ENSG00000142677|K05138;ENSG00000104432|K05431;ENSG00000183625|K04178;ENSG00000182578|K05090;ENSG00000184371|K05453;ENSG00000121858|K04721;ENSG00000112715|K05448;ENSG00000144476|K04304;ENSG0000…	23	ENSG00000115590|K04387;ENSG00000175505|K05421;ENSG00000135960|K05162;ENSG00000116678|K05062;ENSG00000198223|.|K05066;ENSG00000205755|K05078;ENSG00000171889|K05440;ENSG00000120337|K05479;ENSG00000242689|K05420;ENSG00000271503|K12499;ENSG00000102755|K05096;ENSG00000092969|K13376|.;ENSG00000113721|K05089	13	http://www.kegg.jp/pathway/map04060+K05470+K05405+K04387+K05436+K05146+K05137+K02583+K05074+K05433+K05421+K04519+K05138+K05162+K05431+K05062+.|K05066+K05078+K04178+K05090+K05453+K05440+K05479+K05420+K04721+K12499+K05448+K04304+K13596+K04723+K05096+K04383+K05056+.|K05480+K13376|.+K05089+K05079	yes
PI3K-Akt signaling pathway	map04151	59	298	793	6652	0.000655999	ENSG00000110092|K04503;ENSG00000182158|K09048;ENSG00000115414|K05717|.;ENSG00000134259|K02582;ENSG00000198121|K04289;ENSG00000099617|K05462;ENSG00000068078|K05094;ENSG00000136244|K05405;ENSG00000136869|.|K10160;ENSG00000155629|K12230;ENSG00000168209|K08270;ENSG00000064300|K02583;ENSG00000105173|K06626;ENSG00000257337|K03258|.|K18080;ENSG00000156427|K04358;ENSG00000140992|K11447|.|K06276;ENSG00000…	ENSG00000182158|K09048;ENSG00000099617|K05462;ENSG00000068078|K05094;ENSG00000136244|K05405;ENSG00000168209|K08270;ENSG00000064300|K02583;ENSG00000257337|K03258|.|K18080;ENSG00000213949|K06480|.;ENSG00000138448|K06487;ENSG00000105639|K11218;ENSG00000104432|K05431;ENSG00000091128|K06245;ENSG00000167107|K06248|.|K00666;ENSG00000124762|K06625;ENSG00000182578|K05090;ENSG00000176533|K04543;ENSG0000018…	33	ENSG00000110092|K04503;ENSG00000115414|K05717|.;ENSG00000134259|K02582;ENSG00000198121|K04289;ENSG00000136869|.|K10160;ENSG00000155629|K12230;ENSG00000105173|K06626;ENSG00000156427|K04358;ENSG00000140992|K11447|.|K06276;ENSG00000141510|.|K04451;ENSG00000050555|K06247;ENSG00000077782|.|K04362;ENSG00000142627|K05103;ENSG00000080824|K04079|.;ENSG00000169047|K16172;ENSG00000041982|.|K06252;ENSG000001…	26	http://www.kegg.jp/pathway/map04151+K04503+K09048+K05717|.+K02582+K04289+K05462+K05094+K05405+.|K10160+K12230+K08270+K02583+K06626+K03258|.|K18080+K04358+K11447|.|K06276+K06480|.+.|K04451+K06487+K11218+K05431+K06247+K06245+.|K04362+K06248|.|K00666+K05103+K06625+K05090+K04079|.+K04543+K16172+K05453+K05467+K01596+.|K06252+K09047+K04541+K04447+.|K06236+K09048+.|K05095+K03914+K03456+K06243+K07860|K04…	yes
Amoebiasis	map05146	22	78	830	6872	0.000949974	ENSG00000182621|K05858;ENSG00000276600|K07898;ENSG00000115414|K05717|.;ENSG00000136244|K05405;ENSG00000136869|.|K10160;ENSG00000115590|K04387;ENSG00000130402|K05699;ENSG00000057149|K13963;ENSG00000197641|K13963;ENSG00000125538|K04519;ENSG00000142875|K04345;ENSG00000050555|K06247;ENSG00000091128|K06245;ENSG00000060558|K04637;ENSG00000111540|K07888;ENSG00000230438|.|K13963;ENSG00000108821|.|K06236;…	ENSG00000182621|K05858;ENSG00000276600|K07898;ENSG00000136244|K05405;ENSG00000057149|K13963;ENSG00000197641|K13963;ENSG00000125538|K04519;ENSG00000091128|K06245;ENSG00000060558|K04637;ENSG00000111540|K07888;ENSG00000230438|.|K13963;ENSG00000108821|.|K06236;ENSG00000270441|K06243;ENSG00000141404|K04633;ENSG00000081181|K01476;ENSG00000206073|K13963	15	ENSG00000115414|K05717|.;ENSG00000136869|.|K10160;ENSG00000115590|K04387;ENSG00000130402|K05699;ENSG00000142875|K04345;ENSG00000050555|K06247;ENSG00000092969|K13376|.	7	http://www.kegg.jp/pathway/map05146+K05858+K07898+K05717|.+K05405+.|K10160+K04387+K05699+K13963+K13963+K04519+K04345+K06247+K06245+K04637+K07888+.|K13963+.|K06236+K06243+K04633+K01476+K13963+K13376|.	yes
Jak-STAT signaling pathway	map04630	27	106	825	6844	0.000997926	ENSG00000110092|K04503;ENSG00000184557|K04696;ENSG00000136244|K05405;ENSG00000145777|K05436;ENSG00000174564|K05137;ENSG00000134470|K05074;ENSG00000164136|K05433;ENSG00000164056|K04704;ENSG00000175505|K05421;ENSG00000142677|K05138;ENSG00000005339|.|K04498;ENSG00000105639|K11218;ENSG00000114423|K04707;ENSG00000104432|K05431;ENSG00000116678|K05062;ENSG00000198223|.|K05066;ENSG00000138378|K11222;ENSG…	ENSG00000184557|K04696;ENSG00000136244|K05405;ENSG00000145777|K05436;ENSG00000174564|K05137;ENSG00000134470|K05074;ENSG00000164136|K05433;ENSG00000164056|K04704;ENSG00000142677|K05138;ENSG00000105639|K11218;ENSG00000114423|K04707;ENSG00000104432|K05431;ENSG00000138378|K11222;ENSG00000114737|K04701;ENSG00000126561|K11223;ENSG00000096968|K04447;ENSG00000120833|K04695;ENSG00000137070|K05056;ENSG0000…	19	ENSG00000110092|K04503;ENSG00000175505|K05421;ENSG00000005339|.|K04498;ENSG00000116678|K05062;ENSG00000198223|.|K05066;ENSG00000205755|K05078;ENSG00000171889|K05440;ENSG00000242689|K05420	8	http://www.kegg.jp/pathway/map04630+K04503+K04696+K05405+K05436+K05137+K05074+K05433+K04704+K05421+K05138+.|K04498+K11218+K04707+K05431+K05062+.|K05066+K11222+K05078+K04701+K11223+K05440+K05420+K04447+K04695+K05056+K11221+K05079	yes
Cytosolic DNA-sensing pathway	map04623	14	39	838	6911	0.00125578	ENSG00000136244|K05405;ENSG00000186141|K03023;ENSG00000137752|K01370|.;ENSG00000125538|K04519;ENSG00000103490|.|K12799;ENSG00000132664|K03025;ENSG00000161980|K03019;ENSG00000121851|K03024;ENSG00000113356|.|K03024;ENSG00000271503|K12499;ENSG00000177700|K03007;ENSG00000184584|K12654;ENSG00000100413|K03022;ENSG00000104825|K02581	ENSG00000136244|K05405;ENSG00000137752|K01370|.;ENSG00000125538|K04519;ENSG00000121851|K03024;ENSG00000184584|K12654	5	ENSG00000186141|K03023;ENSG00000103490|.|K12799;ENSG00000132664|K03025;ENSG00000161980|K03019;ENSG00000113356|.|K03024;ENSG00000271503|K12499;ENSG00000177700|K03007;ENSG00000100413|K03022;ENSG00000104825|K02581	9	http://www.kegg.jp/pathway/map04623+K05405+K03023+K01370|.+K04519+.|K12799+K03025+K03019+K03024+.|K03024+K12499+K03007+K12654+K03022+K02581	yes
Ovarian steroidogenesis	map04913	13	35	839	6915	0.00144758	ENSG00000012779|K00461;ENSG00000108786|K00044;ENSG00000168970|K19219|K16342;ENSG00000130164|K12473|K20131;ENSG00000159337|K16342;ENSG00000142875|K04345;ENSG00000138061|K07410;ENSG00000153162|K16620;ENSG00000132196|K13373;ENSG00000099251|K13373;ENSG00000243708|K16342;ENSG00000174233|K08046;ENSG00000135346|K08522	ENSG00000012779|K00461;ENSG00000108786|K00044;ENSG00000168970|K19219|K16342;ENSG00000130164|K12473|K20131;ENSG00000159337|K16342;ENSG00000153162|K16620;ENSG00000132196|K13373;ENSG00000099251|K13373;ENSG00000243708|K16342;ENSG00000174233|K08046	10	ENSG00000142875|K04345;ENSG00000138061|K07410;ENSG00000135346|K08522	3	http://www.kegg.jp/pathway/map04913+K00461+K00044+K19219|K16342+K12473|K20131+K16342+K04345+K07410+K16620+K13373+K13373+K16342+K08046+K08522	yes
Epstein-Barr virus infection	map05169	38	185	814	6765	0.00337349	ENSG00000197170|K03035;ENSG00000181222|K03006;ENSG00000188833|K01510;ENSG00000186141|K03023;ENSG00000013275|K03063;ENSG00000175166|K03028;ENSG00000100519|.|K03064;ENSG00000141510|.|K04451;ENSG00000005339|.|K04498;ENSG00000105639|K11218;ENSG00000099341|.|K03031;ENSG00000142875|K04345;ENSG00000185627|K03039;ENSG00000229124|K07606;ENSG00000108840|.|K11406;ENSG00000124762|K06625;ENSG00000204389|K0328…	ENSG00000188833|K01510;ENSG00000105639|K11218;ENSG00000229124|K07606;ENSG00000108840|.|K11406;ENSG00000124762|K06625;ENSG00000121851|K03024;ENSG00000056558|K03172;ENSG00000172071|K08860	8	ENSG00000197170|K03035;ENSG00000181222|K03006;ENSG00000186141|K03023;ENSG00000013275|K03063;ENSG00000175166|K03028;ENSG00000100519|.|K03064;ENSG00000141510|.|K04451;ENSG00000005339|.|K04498;ENSG00000099341|.|K03031;ENSG00000142875|K04345;ENSG00000185627|K03039;ENSG00000204389|K03283;ENSG00000204388|K03283;ENSG00000100764|K03062;ENSG00000241506|K03062;ENSG00000139687|K06618;ENSG00000132664|K03025;…	30	http://www.kegg.jp/pathway/map05169+K03035+K03006+K01510+K03023+K03063+K03028+.|K03064+.|K04451+.|K04498+K11218+.|K03031+K04345+K03039+K07606+.|K11406+K06625+K03283+K03283+K03062+K03062+K06618+K03025+K03019+K03024+K03283|.+.|K03024+K11838+K06256|.+K03007+K03065+K04430+K03172+K08860+K06627+K03066+K03022+K02581+K05855	yes
Terpenoid backbone biosynthesis	map00900	9	21	843	6929	0.00362972	ENSG00000067064|K01823|.;ENSG00000120437|K00626;ENSG00000167508|K01597|K18666;ENSG00000112972|K01641;ENSG00000148459|K12504;ENSG00000160752|K00787;ENSG00000110921|K00869;ENSG00000084073|K06013;ENSG00000113161|K00021	ENSG00000067064|K01823|.;ENSG00000167508|K01597|K18666;ENSG00000112972|K01641;ENSG00000160752|K00787;ENSG00000110921|K00869;ENSG00000113161|K00021	6	ENSG00000120437|K00626;ENSG00000148459|K12504;ENSG00000084073|K06013	3	http://www.kegg.jp/pathway/map00900+K01823|.+K00626+K01597|K18666+K01641+K12504+K00787+K00869+K06013+K00021	yes
Carbon fixation pathways in prokaryotes	map00720	6	10	846	6940	0.0050861	ENSG00000131069|K01895;ENSG00000154930|K01895;ENSG00000124370|K05606;ENSG00000120437|K00626;ENSG00000138413|K00031;ENSG00000177000|K00297|.	ENSG00000131069|K01895;ENSG00000124370|K05606;ENSG00000138413|K00031;ENSG00000177000|K00297|.	4	ENSG00000154930|K01895;ENSG00000120437|K00626	2	http://www.kegg.jp/pathway/map00720+K01895+K01895+K05606+K00626+K00031+K00297|.	yes
Bladder cancer	map05219	11	32	841	6918	0.00531742	ENSG00000110092|K04503;ENSG00000068078|K05094;ENSG00000141510|.|K04451;ENSG00000196611|K01388;ENSG00000124762|K06625;ENSG00000007968|K09389;ENSG00000139687|K06618;ENSG00000112715|K05448;ENSG00000035664|.|K08803;ENSG00000039068|K05689;ENSG00000137801|.|K16857	ENSG00000068078|K05094;ENSG00000124762|K06625;ENSG00000112715|K05448;ENSG00000035664|.|K08803;ENSG00000039068|K05689	5	ENSG00000110092|K04503;ENSG00000141510|.|K04451;ENSG00000196611|K01388;ENSG00000007968|K09389;ENSG00000139687|K06618;ENSG00000137801|.|K16857	6	http://www.kegg.jp/pathway/map05219+K04503+K05094+.|K04451+K01388+K06625+K09389+K06618+K05448+.|K08803+K05689+.|K16857	yes
Complement and coagulation cascades	map04610	16	58	836	6892	0.00538809	ENSG00000159403|K01330;ENSG00000117525|K03901;ENSG00000000971|K04004;ENSG00000205403|K01333;ENSG00000182326|.|K01331;ENSG00000125730|K03990;ENSG00000127241|.|K03992;ENSG00000011422|.|K03985;ENSG00000139178|.|K01330;ENSG00000123843|K04003;ENSG00000168398|K03916;ENSG00000167711|K03983;ENSG00000100739|.|K03915;ENSG00000181104|K03914;ENSG00000110799|K03900;ENSG00000122861|K01348	ENSG00000159403|K01330;ENSG00000000971|K04004;ENSG00000205403|K01333;ENSG00000182326|.|K01331;ENSG00000125730|K03990;ENSG00000127241|.|K03992;ENSG00000139178|.|K01330;ENSG00000168398|K03916;ENSG00000167711|K03983;ENSG00000100739|.|K03915;ENSG00000181104|K03914;ENSG00000110799|K03900;ENSG00000122861|K01348	13	ENSG00000117525|K03901;ENSG00000011422|.|K03985;ENSG00000123843|K04003	3	http://www.kegg.jp/pathway/map04610+K01330+K03901+K04004+K01333+.|K01331+K03990+.|K03992+.|K03985+.|K01330+K04003+K03916+K03983+.|K03915+K03914+K03900+K01348	yes
p53 signaling pathway	map04115	16	60	836	6890	0.0070522	ENSG00000110092|K04503;ENSG00000149212|K10141;ENSG00000105327|.|K10132;ENSG00000105173|K06626;ENSG00000075218|K10129;ENSG00000141682|K10131;ENSG00000219626|.|K10133;ENSG00000138764|K10146;ENSG00000141510|.|K04451;ENSG00000146674|K10138;ENSG00000124762|K06625;ENSG00000099860|K04402;ENSG00000078900|K10148|.;ENSG00000171848|K10808;ENSG00000149547|.|K10134;ENSG00000137801|.|K16857	ENSG00000105327|.|K10132;ENSG00000141682|K10131;ENSG00000219626|.|K10133;ENSG00000138764|K10146;ENSG00000124762|K06625;ENSG00000099860|K04402;ENSG00000078900|K10148|.	7	ENSG00000110092|K04503;ENSG00000149212|K10141;ENSG00000105173|K06626;ENSG00000075218|K10129;ENSG00000141510|.|K04451;ENSG00000146674|K10138;ENSG00000171848|K10808;ENSG00000149547|.|K10134;ENSG00000137801|.|K16857	9	http://www.kegg.jp/pathway/map04115+K04503+K10141+.|K10132+K06626+K10129+K10131+.|K10133+K10146+.|K04451+K10138+K06625+K04402+K10148|.+K10808+.|K10134+.|K16857	yes
Cell adhesion molecules (CAMs)	map04514	25	113	827	6837	0.00729809	ENSG00000179242|K06797;ENSG00000108797|K07379;ENSG00000018236|K06759;ENSG00000196338|K07378;ENSG00000174469|K07380;ENSG00000172260|K06775;ENSG00000149564|K06787;ENSG00000138448|K06487;ENSG00000173482|K05693;ENSG00000163531|K06757;ENSG00000113946|K06087;ENSG00000240661|K06747;ENSG00000253958|K06087;ENSG00000169760|K07378;ENSG00000073008|K06539;ENSG00000279342|K06787;ENSG00000189143|K06087|.;ENSG00…	ENSG00000108797|K07379;ENSG00000196338|K07378;ENSG00000138448|K06487;ENSG00000163531|K06757;ENSG00000113946|K06087;ENSG00000253958|K06087;ENSG00000189143|K06087|.;ENSG00000163347|K06087;ENSG00000110076|.|K07377;ENSG00000039068|K05689	10	ENSG00000179242|K06797;ENSG00000018236|K06759;ENSG00000174469|K07380;ENSG00000172260|K06775;ENSG00000149564|K06787;ENSG00000173482|K05693;ENSG00000240661|K06747;ENSG00000169760|K07378;ENSG00000073008|K06539;ENSG00000279342|K06787;ENSG00000181885|K06087;ENSG00000182985|K06781;ENSG00000213937|K06087;ENSG00000012124|.|K06467;ENSG00000169439|K16336	15	http://www.kegg.jp/pathway/map04514+K06797+K07379+K06759+K07378+K07380+K06775+K06787+K06487+K05693+K06757+K06087+K06747+K06087+K07378+K06539+K06787+K06087|.+K06087+K06087+K06781+.|K07377+K06087+K05689+.|K06467+K16336	yes
Measles	map05162	22	95	830	6855	0.0073707	ENSG00000110092|K04503;ENSG00000136244|K05405;ENSG00000136869|.|K10160;ENSG00000105327|.|K10132;ENSG00000105173|K06626;ENSG00000125538|K04519;ENSG00000141510|.|K04451;ENSG00000173530|K04722;ENSG00000105639|K11218;ENSG00000157601|.|K14754;ENSG00000126561|K11223;ENSG00000204389|K03283;ENSG00000204388|K03283;ENSG00000078900|K10148|.;ENSG00000121858|K04721;ENSG00000109971|K03283|.;ENSG00000096968|K04…	ENSG00000136244|K05405;ENSG00000105327|.|K10132;ENSG00000125538|K04519;ENSG00000105639|K11218;ENSG00000157601|.|K14754;ENSG00000126561|K11223;ENSG00000078900|K10148|.;ENSG00000121858|K04721;ENSG00000096968|K04447;ENSG00000172071|K08860;ENSG00000089127|K14216;ENSG00000115008|K04383;ENSG00000170581|K11221	13	ENSG00000110092|K04503;ENSG00000136869|.|K10160;ENSG00000105173|K06626;ENSG00000141510|.|K04451;ENSG00000173530|K04722;ENSG00000204389|K03283;ENSG00000204388|K03283;ENSG00000109971|K03283|.;ENSG00000104825|K02581	9	http://www.kegg.jp/pathway/map05162+K04503+K05405+.|K10160+.|K10132+K06626+K04519+.|K04451+K04722+K11218+.|K14754+K11223+K03283+K03283+K10148|.+K04721+K03283|.+K04447+K08860+K14216+K04383+K02581+K11221	yes
Viral carcinogenesis	map05203	36	183	816	6767	0.00765706	ENSG00000110092|K04503;ENSG00000182158|K09048;ENSG00000163517|K11418;ENSG00000130402|K05699;ENSG00000103423|K09504;ENSG00000105173|K06626;ENSG00000147883|K04685;ENSG00000141682|K10131;ENSG00000141510|.|K04451;ENSG00000005339|.|K04498;ENSG00000105639|K11218;ENSG00000275713|K11252;ENSG00000142875|K04345;ENSG00000125730|K03990;ENSG00000108840|.|K11406;ENSG00000124762|K06625;ENSG00000183625|K04178;EN…	ENSG00000182158|K09048;ENSG00000163517|K11418;ENSG00000147883|K04685;ENSG00000141682|K10131;ENSG00000105639|K11218;ENSG00000275713|K11252;ENSG00000125730|K03990;ENSG00000108840|.|K11406;ENSG00000124762|K06625;ENSG00000183625|K04178;ENSG00000126561|K11223;ENSG00000148180|K11447|K05768;ENSG00000150672|K12076|K12075;ENSG00000146592|K09047;ENSG00000180596|K11252;ENSG00000128340|K07860|K04392;ENSG0000…	21	ENSG00000110092|K04503;ENSG00000130402|K05699;ENSG00000103423|K09504;ENSG00000105173|K06626;ENSG00000141510|.|K04451;ENSG00000005339|.|K04498;ENSG00000142875|K04345;ENSG00000100764|K03062;ENSG00000241506|K03062;ENSG00000139687|K06618;ENSG00000187555|K11838;ENSG00000060566|K09048;ENSG00000133101|K06627;ENSG00000165025|K05855;ENSG00000117399|K03363	15	http://www.kegg.jp/pathway/map05203+K04503+K09048+K11418+K05699+K09504+K06626+K04685+K10131+.|K04451+.|K04498+K11218+K11252+K04345+K03990+.|K11406+K06625+K04178+K11223+K11447|K05768+K03062+K03062+K06618+K12076|K12075+K09047+K11838+K11252+K09048+K07860|K04392+K03172+K02146+K06627+K11252+K09254+K11407+K05855+K03363	yes
Sesquiterpenoid and triterpenoid biosynthesis	map00909	2	0	850	6950	0.0119128	ENSG00000079459|.|K00801;ENSG00000104549|K00511	ENSG00000079459|.|K00801;ENSG00000104549|K00511	2	.	0	http://www.kegg.jp/pathway/map00909+.|K00801+K00511	yes
Proteasome	map03050	13	48	839	6902	0.0130056	ENSG00000197170|K03035;ENSG00000013275|K03063;ENSG00000175166|K03028;ENSG00000100519|.|K03064;ENSG00000099341|.|K03031;ENSG00000185627|K03039;ENSG00000100764|K03062;ENSG00000241506|K03062;ENSG00000165916|K03065;ENSG00000131467|K06698;ENSG00000240065|K02741;ENSG00000087191|K03066;ENSG00000126067|K02734	ENSG00000240065|K02741	1	ENSG00000197170|K03035;ENSG00000013275|K03063;ENSG00000175166|K03028;ENSG00000100519|.|K03064;ENSG00000099341|.|K03031;ENSG00000185627|K03039;ENSG00000100764|K03062;ENSG00000241506|K03062;ENSG00000165916|K03065;ENSG00000131467|K06698;ENSG00000087191|K03066;ENSG00000126067|K02734	12	http://www.kegg.jp/pathway/map03050+K03035+K03063+K03028+.|K03064+.|K03031+K03039+K03062+K03062+K03065+K06698+K02741+K03066+K02734	yes
Maturity onset diabetes of the young	map04950	6	14	846	6936	0.0168368	ENSG00000182759|K07595;ENSG00000125798|K08035;ENSG00000116833|K08027;ENSG00000163623|K08030;ENSG00000114315|K06054;ENSG00000101076|K07292	ENSG00000182759|K07595;ENSG00000125798|K08035;ENSG00000163623|K08030	3	ENSG00000116833|K08027;ENSG00000114315|K06054;ENSG00000101076|K07292	3	http://www.kegg.jp/pathway/map04950+K07595+K08035+K08027+K08030+K06054+K07292	yes
Insulin secretion	map04911	16	68	836	6882	0.018217	ENSG00000182621|K05858;ENSG00000182158|K09048;ENSG00000176406|K15297;ENSG00000105649|K07882;ENSG00000070808|K04515;ENSG00000091428|K04351|.;ENSG00000142875|K04345;ENSG00000135643|K04941;ENSG00000198626|K04962;ENSG00000171121|K04939;ENSG00000146592|K09047;ENSG00000060566|K09048;ENSG00000186472|K16882;ENSG00000105409|K01539;ENSG00000174233|K08046;ENSG00000117394|K07299|.	ENSG00000182621|K05858;ENSG00000182158|K09048;ENSG00000105649|K07882;ENSG00000070808|K04515;ENSG00000091428|K04351|.;ENSG00000135643|K04941;ENSG00000146592|K09047;ENSG00000174233|K08046	8	ENSG00000176406|K15297;ENSG00000142875|K04345;ENSG00000198626|K04962;ENSG00000171121|K04939;ENSG00000060566|K09048;ENSG00000186472|K16882;ENSG00000105409|K01539;ENSG00000117394|K07299|.	8	http://www.kegg.jp/pathway/map04911+K05858+K09048+K15297+K07882+K04515+K04351|.+K04345+K04941+K04962+K04939+K09047+K09048+K16882+K01539+K08046+K07299|.	yes
Axon guidance	map04360	23	111	829	6839	0.0182666	ENSG00000099617|K05462;ENSG00000182168|K07521;ENSG00000223820|.|K05765;ENSG00000138835|K07524;ENSG00000112902|K06841;ENSG00000237161|K04410;ENSG00000143434|K06842;ENSG00000142627|K05103;ENSG00000153993|K06840;ENSG00000154134|K06755;ENSG00000170381|K06840;ENSG00000146904|K05102|K06273;ENSG00000263006|.|K04514;ENSG00000074527|K06845;ENSG00000099250|K06724;ENSG00000145147|K06839;ENSG00000116106|.|K0…	ENSG00000099617|K05462;ENSG00000223820|.|K05765;ENSG00000138835|K07524;ENSG00000237161|K04410;ENSG00000143434|K06842;ENSG00000146904|K05102|K06273;ENSG00000263006|.|K04514;ENSG00000074527|K06845;ENSG00000066248|K07525;ENSG00000128340|K07860|K04392;ENSG00000092964|.|K07528;ENSG00000001617|K06840;ENSG00000196220|K07526|.	13	ENSG00000182168|K07521;ENSG00000112902|K06841;ENSG00000142627|K05103;ENSG00000153993|K06840;ENSG00000154134|K06755;ENSG00000170381|K06840;ENSG00000099250|K06724;ENSG00000145147|K06839;ENSG00000116106|.|K05105;ENSG00000125266|K05463	10	http://www.kegg.jp/pathway/map04360+K05462+K07521+.|K05765+K07524+K06841+K04410+K06842+K05103+K06840+K06755+K06840+K05102|K06273+.|K04514+K06845+K06724+K06839+.|K05105+K07525+K07860|K04392+.|K07528+K05463+K06840+K07526|.	yes
MAPK signaling pathway	map04010	42	238	810	6712	0.0196781	ENSG00000120129|K04459;ENSG00000134259|K02582;ENSG00000068078|K05094;ENSG00000115590|K04387;ENSG00000168970|K19219|K16342;ENSG00000099875|K04372;ENSG00000011485|K04460;ENSG00000156427|K04358;ENSG00000182389|K11447|.|K04865;ENSG00000185652|K04356;ENSG00000159337|K16342;ENSG00000125538|K04519;ENSG00000141510|.|K04451;ENSG00000176697|K04355;ENSG00000237161|K04410;ENSG00000142875|K04345;ENSG000000671…	ENSG00000068078|K05094;ENSG00000168970|K19219|K16342;ENSG00000099875|K04372;ENSG00000182389|K11447|.|K04865;ENSG00000159337|K16342;ENSG00000125538|K04519;ENSG00000237161|K04410;ENSG00000067191|K04862;ENSG00000175197|K04452;ENSG00000071242|K04373;ENSG00000099860|K04402;ENSG00000158050|K04459;ENSG00000160867|.|K05095;ENSG00000128340|K07860|K04392;ENSG00000123358|.|K04465;ENSG00000111266|K04459;ENSG…	22	ENSG00000120129|K04459;ENSG00000134259|K02582;ENSG00000115590|K04387;ENSG00000011485|K04460;ENSG00000156427|K04358;ENSG00000185652|K04356;ENSG00000141510|.|K04451;ENSG00000176697|K04355;ENSG00000142875|K04345;ENSG00000077782|.|K04362;ENSG00000113319|K12326;ENSG00000204389|K03283;ENSG00000204388|K03283;ENSG00000128591|K04437;ENSG00000109971|K03283|.;ENSG00000120875|K04459;ENSG00000065559|K04430;EN…	20	http://www.kegg.jp/pathway/map04010+K04459+K02582+K05094+K04387+K19219|K16342+K04372+K04460+K04358+K11447|.|K04865+K04356+K16342+K04519+.|K04451+K04355+K04410+K04345+K04862+.|K04362+K12326+K04452+K03283+K03283+K04373+K04402+K04437+K03283|.+K04459+K04459+.|K05095+K07860|K04392+K04430+.|K04465+K04459+K04358+K04463+K16342+K04415+K04439|.+K04383+K13376|.+K05089+K04358	yes
Hematopoietic cell lineage	map04640	14	57	838	6893	0.0197648	ENSG00000136244|K05405;ENSG00000115590|K04387;ENSG00000125538|K04519;ENSG00000213949|K06480|.;ENSG00000166825|K11140;ENSG00000104432|K05431;ENSG00000198223|.|K05066;ENSG00000182578|K05090;ENSG00000184371|K05453;ENSG00000026508|K06256|.;ENSG00000115008|K04383;ENSG00000012124|.|K06467;ENSG00000137070|K05056;ENSG00000187266|K05079	ENSG00000136244|K05405;ENSG00000125538|K04519;ENSG00000213949|K06480|.;ENSG00000104432|K05431;ENSG00000182578|K05090;ENSG00000184371|K05453;ENSG00000115008|K04383;ENSG00000137070|K05056;ENSG00000187266|K05079	9	ENSG00000115590|K04387;ENSG00000166825|K11140;ENSG00000198223|.|K05066;ENSG00000026508|K06256|.;ENSG00000012124|.|K06467	5	http://www.kegg.jp/pathway/map04640+K05405+K04387+K04519+K06480|.+K11140+K05431+.|K05066+K05090+K05453+K06256|.+K04383+.|K06467+K05056+K05079	yes
Neuroactive ligand-receptor interaction	map04080	34	186	818	6764	0.0225921	ENSG00000126010|K04169;ENSG00000198121|K04289;ENSG00000204681|K04615;ENSG00000180914|K04229;ENSG00000135124|K05218;ENSG00000139874|K04217;ENSG00000148680|K04163;ENSG00000122420|K04262;ENSG00000109738|K05196;ENSG00000180739|K04295;ENSG00000174456|.|K05220;ENSG00000182771|K05206;ENSG00000116678|K05062;ENSG00000164418|.|K05202;ENSG00000168398|K03916;ENSG00000174343|K04810;ENSG00000064989|.|K04577;EN…	ENSG00000204681|K04615;ENSG00000135124|K05218;ENSG00000148680|K04163;ENSG00000109738|K05196;ENSG00000180739|K04295;ENSG00000174456|.|K05220;ENSG00000168398|K03916;ENSG00000174343|K04810;ENSG00000064989|.|K04577;ENSG00000164220|K04235;ENSG00000100739|.|K03915;ENSG00000181104|K03914;ENSG00000010310|K04580;ENSG00000108405|K05215;ENSG00000064547|K04291	15	ENSG00000126010|K04169;ENSG00000198121|K04289;ENSG00000180914|K04229;ENSG00000139874|K04217;ENSG00000122420|K04262;ENSG00000182771|K05206;ENSG00000116678|K05062;ENSG00000164418|.|K05202;ENSG00000163485|K04265;ENSG00000169860|K04270;ENSG00000011677|K05175;ENSG00000151090|K08362;ENSG00000083454|K05219;ENSG00000184160|K04140;ENSG00000129749|K04811;ENSG00000125384|K04259;ENSG00000187474|K04173;ENSG00…	19	http://www.kegg.jp/pathway/map04080+K04169+K04289+K04615+K04229+K05218+K04217+K04163+K04262+K05196+K04295+.|K05220+K05206+K05062+.|K05202+K03916+K04810+.|K04577+K04265+K04270+K04235+K05175+.|K03915+K08362+K05219+K03914+K04140+K04580+K04811+K05215+K04259+K04173+K05192+K04291+K08522	yes
TNF signaling pathway	map04668	22	108	830	6842	0.0239943	ENSG00000182158|K09048;ENSG00000184557|K04696;ENSG00000136244|K05405;ENSG00000237036|K05632;ENSG00000003400|K04400;ENSG00000164136|K05433;ENSG00000125538|K04519;ENSG00000171223|K09028;ENSG00000163739|K05505;ENSG00000184371|K05453;ENSG00000157227|K07763;ENSG00000106976|K01528|K17065;ENSG00000168404|K08849;ENSG00000172216|K10048;ENSG00000146592|K09047;ENSG00000271503|K12499;ENSG00000060566|K09048;E…	ENSG00000182158|K09048;ENSG00000184557|K04696;ENSG00000136244|K05405;ENSG00000237036|K05632;ENSG00000003400|K04400;ENSG00000164136|K05433;ENSG00000125538|K04519;ENSG00000171223|K09028;ENSG00000184371|K05453;ENSG00000157227|K07763;ENSG00000106976|K01528|K17065;ENSG00000172216|K10048;ENSG00000146592|K09047;ENSG00000081041|K05505;ENSG00000056558|K03172;ENSG00000107968|K04415	16	ENSG00000163739|K05505;ENSG00000168404|K08849;ENSG00000271503|K12499;ENSG00000060566|K09048;ENSG00000065559|K04430;ENSG00000078401|K16366	6	http://www.kegg.jp/pathway/map04668+K09048+K04696+K05405+K05632+K04400+K05433+K04519+K09028+K05505+K05453+K07763+K01528|K17065+K08849+K10048+K09047+K12499+K09048+K05505+K04430+K03172+K16366+K04415	yes
Rheumatoid arthritis	map05323	15	67	837	6883	0.0304871	ENSG00000136244|K05405;ENSG00000136869|.|K10160;ENSG00000171130|K02153;ENSG00000164136|K05433;ENSG00000125538|K04519;ENSG00000196611|K01388;ENSG00000105929|K02154;ENSG00000184371|K05453;ENSG00000143882|K02148;ENSG00000271503|K12499;ENSG00000112715|K05448;ENSG00000147614|K02146;ENSG00000102755|K05096;ENSG00000115008|K04383;ENSG00000092969|K13376|.	ENSG00000136244|K05405;ENSG00000164136|K05433;ENSG00000125538|K04519;ENSG00000184371|K05453;ENSG00000143882|K02148;ENSG00000112715|K05448;ENSG00000147614|K02146;ENSG00000115008|K04383	8	ENSG00000136869|.|K10160;ENSG00000171130|K02153;ENSG00000196611|K01388;ENSG00000105929|K02154;ENSG00000271503|K12499;ENSG00000102755|K05096;ENSG00000092969|K13376|.	7	http://www.kegg.jp/pathway/map05323+K05405+.|K10160+K02153+K05433+K04519+K01388+K02154+K05453+K02148+K12499+K05448+K02146+K05096+K04383+K13376|.	yes
Sulfur metabolism	map00920	5	12	847	6938	0.031046	ENSG00000109193|K01016;ENSG00000128309|K01011;ENSG00000088002|K01015;ENSG00000196502|K01014;ENSG00000137767|K17218	ENSG00000109193|K01016;ENSG00000128309|K01011;ENSG00000088002|K01015;ENSG00000196502|K01014;ENSG00000137767|K17218	5	.	0	http://www.kegg.jp/pathway/map00920+K01016+K01011+K01015+K01014+K17218	yes
alpha-Linolenic acid metabolism	map00592	6	17	846	6933	0.0330708	ENSG00000168970|K19219|K16342;ENSG00000159337|K16342;ENSG00000123739|K01047;ENSG00000184381|K16343;ENSG00000163803|K14621;ENSG00000243708|K16342	ENSG00000168970|K19219|K16342;ENSG00000159337|K16342;ENSG00000123739|K01047;ENSG00000184381|K16343;ENSG00000163803|K14621;ENSG00000243708|K16342	6	.	0	http://www.kegg.jp/pathway/map00592+K19219|K16342+K16342+K01047+K16343+K14621+K16342	yes
Wnt signaling pathway	map04310	23	120	829	6830	0.0363521	ENSG00000110092|K04503;ENSG00000137673|K01397;ENSG00000182621|K05858;ENSG00000267317|K02085;ENSG00000141510|.|K04451;ENSG00000070808|K04515;ENSG00000005339|.|K04498;ENSG00000142875|K04345;ENSG00000139174|.|K04511;ENSG00000134245|K00182;ENSG00000165879|K03069;ENSG00000081059|K02620;ENSG00000107984|K02165;ENSG00000263006|.|K04514;ENSG00000164736|K04495;ENSG00000128340|K07860|K04392;ENSG00000175792|…	ENSG00000182621|K05858;ENSG00000267317|K02085;ENSG00000070808|K04515;ENSG00000134245|K00182;ENSG00000165879|K03069;ENSG00000081059|K02620;ENSG00000263006|.|K04514;ENSG00000128340|K07860|K04392;ENSG00000111186|K00444;ENSG00000163637|.|K04511;ENSG00000163251|K02375;ENSG00000145506|K03213	12	ENSG00000110092|K04503;ENSG00000137673|K01397;ENSG00000141510|.|K04451;ENSG00000005339|.|K04498;ENSG00000142875|K04345;ENSG00000139174|.|K04511;ENSG00000107984|K02165;ENSG00000164736|K04495;ENSG00000175792|.|K04499;ENSG00000111432|K02842;ENSG00000175592|K04502	11	http://www.kegg.jp/pathway/map04310+K04503+K01397+K05858+K02085+.|K04451+K04515+.|K04498+K04345+.|K04511+K00182+K03069+K02620+K02165+.|K04514+K04495+K07860|K04392+.|K04499+K02842+K00444+.|K04511+K02375+K04502+K03213	yes
RNA polymerase	map03020	8	28	844	6922	0.0370189	ENSG00000181222|K03006;ENSG00000186141|K03023;ENSG00000132664|K03025;ENSG00000161980|K03019;ENSG00000121851|K03024;ENSG00000113356|.|K03024;ENSG00000177700|K03007;ENSG00000100413|K03022	ENSG00000121851|K03024	1	ENSG00000181222|K03006;ENSG00000186141|K03023;ENSG00000132664|K03025;ENSG00000161980|K03019;ENSG00000113356|.|K03024;ENSG00000177700|K03007;ENSG00000100413|K03022	7	http://www.kegg.jp/pathway/map03020+K03006+K03023+K03025+K03019+K03024+.|K03024+K03007+K03022	yes
Proteoglycans in cancer	map05205	37	216	815	6734	0.0384601	ENSG00000110092|K04503;ENSG00000142798|K06255;ENSG00000115414|K05717|.;ENSG00000092820|K08007;ENSG00000136869|.|K10160;ENSG00000257337|K03258|.|K18080;ENSG00000156427|K04358;ENSG00000141510|.|K04451;ENSG00000070808|K04515;ENSG00000138448|K06487;ENSG00000114423|K04707;ENSG00000180353|K06106;ENSG00000142875|K04345;ENSG00000139329|K08122;ENSG00000011422|.|K03985;ENSG00000077782|.|K04362;ENSG00000134…	ENSG00000142798|K06255;ENSG00000257337|K03258|.|K18080;ENSG00000070808|K04515;ENSG00000138448|K06487;ENSG00000114423|K04707;ENSG00000134245|K00182;ENSG00000124762|K06625;ENSG00000263006|.|K04514;ENSG00000128340|K07860|K04392;ENSG00000112715|K05448;ENSG00000145362|.|K10380;ENSG00000162344|K04358;ENSG00000111186|K00444;ENSG00000122861|K01348;ENSG00000150995|K04958;ENSG00000150593|K16865;ENSG0000015…	19	ENSG00000110092|K04503;ENSG00000115414|K05717|.;ENSG00000092820|K08007;ENSG00000136869|.|K10160;ENSG00000156427|K04358;ENSG00000141510|.|K04451;ENSG00000180353|K06106;ENSG00000142875|K04345;ENSG00000139329|K08122;ENSG00000011422|.|K03985;ENSG00000077782|.|K04362;ENSG00000128591|K04437;ENSG00000026508|K06256|.;ENSG00000243635|K08007;ENSG00000111432|K02842;ENSG00000092969|K13376|.;ENSG00000137801|.…	18	http://www.kegg.jp/pathway/map05205+K04503+K06255+K05717|.+K08007+.|K10160+K03258|.|K18080+K04358+.|K04451+K04515+K06487+K04707+K06106+K04345+K08122+.|K03985+.|K04362+K00182+K06625+K04437+.|K04514+K06256|.+K07860|K04392+K05448+K08007+.|K10380+K04358+K02842+K00444+K01348+K04958+K16865+K10380+K02375+K13376|.+K04358+.|K16857+K16336	yes
Steroid biosynthesis	map00100	6	18	846	6932	0.0401591	ENSG00000001630|K05917;ENSG00000019186|K07436;ENSG00000052802|K07750;ENSG00000132196|K13373;ENSG00000186104|K07419;ENSG00000099251|K13373	ENSG00000001630|K05917;ENSG00000019186|K07436;ENSG00000052802|K07750;ENSG00000132196|K13373;ENSG00000099251|K13373	5	ENSG00000186104|K07419	1	http://www.kegg.jp/pathway/map00100+K05917+K07436+K07750+K13373+K07419+K13373	yes
Linoleic acid metabolism	map00591	6	18	846	6932	0.0401591	ENSG00000168970|K19219|K16342;ENSG00000159337|K16342;ENSG00000123739|K01047;ENSG00000184381|K16343;ENSG00000163803|K14621;ENSG00000243708|K16342	ENSG00000168970|K19219|K16342;ENSG00000159337|K16342;ENSG00000123739|K01047;ENSG00000184381|K16343;ENSG00000163803|K14621;ENSG00000243708|K16342	6	.	0	http://www.kegg.jp/pathway/map00591+K19219|K16342+K16342+K01047+K16343+K14621+K16342	yes
Glutathione metabolism	map00480	10	40	842	6910	0.0411319	ENSG00000133433|K00799;ENSG00000115758|K01581;ENSG00000178814|K01469;ENSG00000099984|K00799;ENSG00000166825|K11140;ENSG00000138413|K00031;ENSG00000168765|K00799;ENSG00000116649|K00797;ENSG00000244556|K01581;ENSG00000171848|K10808	ENSG00000133433|K00799;ENSG00000178814|K01469;ENSG00000099984|K00799;ENSG00000138413|K00031;ENSG00000168765|K00799;ENSG00000244556|K01581	6	ENSG00000115758|K01581;ENSG00000166825|K11140;ENSG00000116649|K00797;ENSG00000171848|K10808	4	http://www.kegg.jp/pathway/map00480+K00799+K01581+K01469+K00799+K11140+K00031+K00799+K00797+K01581+K10808	yes
PPAR signaling pathway	map03320	13	58	839	6892	0.0418262	ENSG00000110090|K08765;ENSG00000186951|.|K07294|K20131;ENSG00000164687|K08754;ENSG00000175445|K01059|.;ENSG00000140992|K11447|.|K06276;ENSG00000151726|K01897;ENSG00000145284|K00507;ENSG00000095637|K06086;ENSG00000196611|K01388;ENSG00000100889|K01596;ENSG00000099194|K00507;ENSG00000130304|.|K08745;ENSG00000104043|K08746|K01530	ENSG00000186951|.|K07294|K20131;ENSG00000151726|K01897;ENSG00000145284|K00507;ENSG00000095637|K06086;ENSG00000100889|K01596;ENSG00000099194|K00507;ENSG00000130304|.|K08745;ENSG00000104043|K08746|K01530	8	ENSG00000110090|K08765;ENSG00000164687|K08754;ENSG00000175445|K01059|.;ENSG00000140992|K11447|.|K06276;ENSG00000196611|K01388	5	http://www.kegg.jp/pathway/map03320+K08765+.|K07294|K20131+K08754+K01059|.+K11447|.|K06276+K01897+K00507+K06086+K01388+K01596+K00507+.|K08745+K08746|K01530	yes
Calcium signaling pathway	map04020	29	163	823	6787	0.0433075	ENSG00000182621|K05858;ENSG00000126010|K04169;ENSG00000176170|K04718;ENSG00000180914|K04229;ENSG00000135124|K05218;ENSG00000148680|K04163;ENSG00000198838|.|K04963;ENSG00000122420|K04262;ENSG00000174456|.|K05220;ENSG00000187091|K05857;ENSG00000070808|K04515;ENSG00000196296|K05853;ENSG00000142875|K04345;ENSG00000060558|K04637;ENSG00000198626|K04962;ENSG00000168398|K03916;ENSG00000101306|K00907;ENSG…	ENSG00000182621|K05858;ENSG00000176170|K04718;ENSG00000135124|K05218;ENSG00000148680|K04163;ENSG00000174456|.|K05220;ENSG00000187091|K05857;ENSG00000070808|K04515;ENSG00000196296|K05853;ENSG00000060558|K04637;ENSG00000168398|K03916;ENSG00000100739|.|K03915;ENSG00000175938|K16058;ENSG00000181104|K03914;ENSG00000058668|K05850;ENSG00000141404|K04633;ENSG00000108405|K05215;ENSG00000150995|K04958	17	ENSG00000126010|K04169;ENSG00000180914|K04229;ENSG00000198838|.|K04963;ENSG00000122420|K04262;ENSG00000142875|K04345;ENSG00000198626|K04962;ENSG00000101306|K00907;ENSG00000183023|K05849;ENSG00000083454|K05219;ENSG00000154678|K13755;ENSG00000113721|K05089;ENSG00000198668|K02183|.	12	http://www.kegg.jp/pathway/map04020+K05858+K04169+K04718+K04229+K05218+K04163+.|K04963+K04262+.|K05220+K05857+K04515+K05853+K04345+K04637+K04962+K03916+K00907+.|K03915+K16058+K05849+K05219+K03914+K13755+K05850+K04633+K05215+K04958+K05089+K02183|.	yes
Synthesis and degradation of ketone bodies	map00072	4	9	848	6941	0.0451647	ENSG00000164039|K00019;ENSG00000120437|K00626;ENSG00000161267|K00019;ENSG00000112972|K01641	ENSG00000164039|K00019;ENSG00000112972|K01641	2	ENSG00000120437|K00626;ENSG00000161267|K00019	2	http://www.kegg.jp/pathway/map00072+K00019+K00626+K00019+K01641	yes
Pertussis	map05133	15	72	837	6878	0.0484198	ENSG00000159403|K01330;ENSG00000136244|K05405;ENSG00000136869|.|K10160;ENSG00000223820|.|K05765;ENSG00000137752|K01370|.;ENSG00000125538|K04519;ENSG00000182326|.|K01331;ENSG00000125730|K03990;ENSG00000139178|.|K01330;ENSG00000123843|K04003;ENSG00000122852|K10067;ENSG00000103490|.|K12799;ENSG00000277883|K12800;ENSG00000115008|K04383;ENSG00000198668|K02183|.	ENSG00000159403|K01330;ENSG00000136244|K05405;ENSG00000223820|.|K05765;ENSG00000137752|K01370|.;ENSG00000125538|K04519;ENSG00000182326|.|K01331;ENSG00000125730|K03990;ENSG00000139178|.|K01330;ENSG00000122852|K10067;ENSG00000277883|K12800;ENSG00000115008|K04383	11	ENSG00000136869|.|K10160;ENSG00000123843|K04003;ENSG00000103490|.|K12799;ENSG00000198668|K02183|.	4	http://www.kegg.jp/pathway/map05133+K01330+K05405+.|K10160+.|K05765+K01370|.+K04519+.|K01331+K03990+.|K01330+K04003+K10067+.|K12799+K12800+K04383+K02183|.	yes
